# Supplementary material
Source: Springer Nature journal article supplement (https://www.springermedizin.de/resource/supplementary/12985_2012_1962_MOESM2_ESM.pdf/9610892)

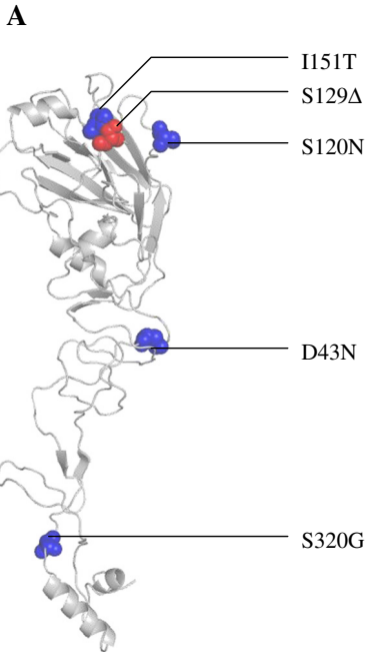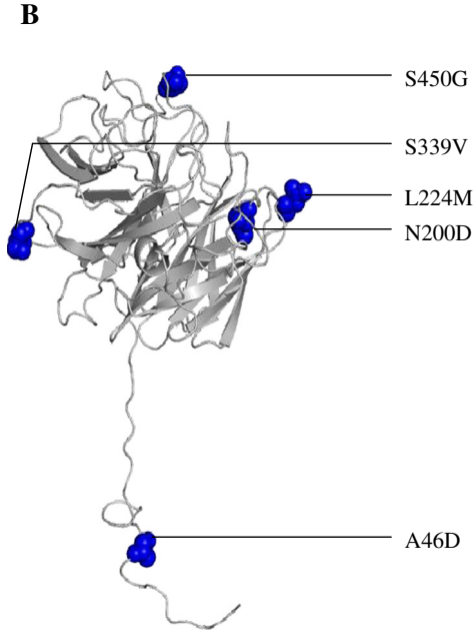

Supplement: MOESM2 [file 9610892]
